# Supplementary material
Source: PubMed Central journal article supplement (PMC167177)
Supplement: plntcell_15_8_1888__1.pdf [file plntcell_15_8_1888__1.pdf]

**Supplemental Table 1.** Proteins used in Maximum Likelihood Analyses and their Levels of Support for the Monophyly of Chara and Land Plants

| Protein | Sites <sup>a</sup> |          | Rate of Evolution <sup>b</sup> | Support <sup>c</sup> |
|---------|--------------------|----------|--------------------------------|----------------------|
|         | Total              | Variable |                                |                      |
| Atp1    | 465                | 172      | 1.00                           | –                    |
| Atp6    | 238                | 108      | 1.06                           | 0.64*                |
| Atp8    | 75                 | 70       | 3.78                           | 0.31                 |
| Atp9    | 73                 | 29       | 0.40                           | –                    |
| Cob     | 370                | 123      | 0.76                           | 0.25                 |
| Cox1    | 506                | 95       | 0.37                           | 0.70*                |
| Cox2    | 238                | 103      | 0.87                           | 0.48                 |
| Cox3    | 260                | 110      | 1.18                           | –                    |
| MttB    | 193                | 175      | 4.97                           | 0.84*                |
| Nad1    | 319                | 116      | 0.94                           | –                    |
| Nad2    | 438                | 232      | 1.68                           | 0.66*                |
| Nad3    | 114                | 66       | 1.18                           | 0.25                 |
| Nad4    | 466                | 195      | 1.20                           | 0.88*                |
| Nad4L   | 100                | 57       | 1.06                           | –                    |
| Nad5    | 636                | 274      | 1.35                           | 0.93*                |
| Nad6    | 152                | 91       | 1.40                           | 0.65*                |
| Nad9    | 163                | 105      | 1.89                           | 0.58                 |
| Rpl5    | 65                 | 63       | 4.83                           | 0.23*                |
| Rps3    | 154                | 131      | 3.74                           | –                    |
| Rps4    | 125                | 117      | 5.16                           | 0.53*                |
| Rps7    | 101                | 77       | 2.81                           | 0.44*                |
| Rps12   | 115                | 69       | 1.49                           | 0.54                 |
| Ymf39   | 104                | 97       | 5.06                           | –                    |

<sup>a</sup>Number of sites corresponding to each protein in the concatenated amino acid data set.

<sup>b</sup>Specific rates of evolution were estimated from the concatenated data set using CODEML (option Mgene = 0) and a gamma-distributed rate of substitutions across sites ( $\alpha = 1.0$ ).

<sup>c</sup>For each protein, a RELL bootstrap value is provided for the best tree only if the topology of this tree supports the monophyly of Chara and land plants. The presence of an asterisk indicates that the topology of the best tree is identical to that shown in Figure 3. Bootstrap values were obtained by analyzing the concatenated data set using CODEML (option Mgene = 1) and a gamma-distributed rate of substitutions across sites ( $\alpha = 0.93$ ).
