# Supplementary material
Source: PubMed Central journal article supplement (PMC167177)
Supplement: plntcell_15_8_1888__2.pdf [file plntcell_15_8_1888__2.pdf]

**Supplemental Table 2.** General Features of Chara Mitochondrial Introns and of their ORFs

| Intron              |             |                   |           | Intron ORF            |             |                       |             |
|---------------------|-------------|-------------------|-----------|-----------------------|-------------|-----------------------|-------------|
|                     | Designation | Site <sup>a</sup> | Size (nt) | Subgroup <sup>b</sup> | Size (a.a.) | Location <sup>c</sup> | Frame       |
| <i>atp9.i1</i>      | 148         | 2315              | IIA       | 576                   | DIV         | Free                  | RT(YADD), X |
| <i>atp9.i2</i>      | 246         | 998               | IIA       | –                     | –           | –                     | –           |
| <i>cob.i1</i>       | 262         | 742               | IIA       | –                     | –           | –                     | –           |
| <i>cob.i2</i>       | 525         | 2014              | IIB       | 448                   | DIV         | Free                  | RT(YADD), X |
| <i>cob.i3</i>       | 676         | 642               | IIA       | –                     | –           | –                     | –           |
| <i>cox1.i1</i>      | 214         | 1692              | IIA       | 389                   | DIV         | Free                  | RT(YEKD), X |
| <i>cox1.i2</i>      | 732         | 671               | IB        | –                     | –           | –                     | –           |
| <i>cox1.i3</i>      | 743         | 377               | IB        | –                     | –           | –                     | –           |
| <i>cox1.i4</i>      | 838         | 2019              | IIA       | 550                   | DIV         | Free                  | RT(YADD), X |
| <i>cox1.i5</i>      | 879         | 276               | IB2       | –                     | –           | –                     | –           |
| <i>cox1.i6</i>      | 912         | 339               | IB2       | –                     | –           | –                     | –           |
| <i>cox2.i1</i>      | 131         | 1123              | IIA       | –                     | –           | –                     | –           |
| <i>nad3.i1</i>      | 152         | 2554              | IIA       | 713 <sup>e</sup>      | DIV         | Fused                 | RT(FADD), X |
| <i>nad3.i2</i>      | 223         | 2397              | IIA       | 558                   | DIV         | Free                  | RT(YADD), X |
| <i>nad4.i1</i>      | 973         | 1693              | IIA       | –                     | –           | –                     | –           |
| <i>rnl.i1</i>       | 779         | 455               | IA3       | –                     | –           | –                     | –           |
| <i>rnl.i2</i>       | 1923        | 261               | IB4       | –                     | –           | –                     | –           |
| <i>rnl.i3</i>       | 1931        | 449               | IB4       | –                     | –           | –                     | –           |
| <i>rnl.i4</i>       | 1943        | 263               | IB        | –                     | –           | –                     | –           |
| <i>rnl.i5</i>       | 2262        | 297               | IB        | –                     | –           | –                     | –           |
| <i>rnl.i6</i>       | 2500        | 382               | IB4       | –                     | –           | –                     | –           |
| <i>rnl.i7</i>       | 2533        | 444               | IA3       | –                     | –           | –                     | –           |
| <i>rnl.i8</i>       | 2571        | 535               | IB        | –                     | –           | –                     | –           |
| <i>rnl.i9</i>       | 2584        | 321               | IB        | –                     | –           | –                     | –           |
| <i>rns.i1</i>       | 793         | 1013              | IA3       | 259                   | L8          | Free                  | LAGLIDADG   |
| <i>rps3.i1</i>      | 74          | 1231              | IIA       | –                     | –           | –                     | –           |
| <i>trnN(guu).i1</i> | 38          | 605               | IIA       | –                     | –           | –                     | –           |

<sup>a</sup>For protein-coding and tRNA genes, insertion sites are given relative to the corresponding genes in *Reclinomonas americana*; for rRNA genes, they are given relative to the corresponding genes in *Escherichia coli*. For each site, the position corresponding to the nucleotide immediately preceding the intron is reported.

<sup>b</sup>Six IB introns could not be unambiguously assigned to any of the four subcategories described by Michel and Westhof (1990).

<sup>c</sup>D refers to a domain of group II intron secondary structure; L followed by a number refers to the loop extending the base-paired region identified by the number.

<sup>d</sup>RT, reverse transcriptase domain, with the catalytic motif in subdomain 5 indicated in parentheses; X, domain X (putative splicing function).

<sup>e</sup>Size was determined based on the first amino acid fully coded within the intron.
