# Supplementary material
Source: PubMed Central journal article supplement (PMC167177)
Supplement: plntcell_15_8_1888__3.pdf [file plntcell_15_8_1888__3.pdf]

**Supplemental Table 3.** Introns Identically Positioned in Chara mtDNA and in Organelle Genomes from Chlorophytes and Non-Green Plants

| Chara Intron <sup>a</sup> | Identically Positioned Introns <sup>b</sup>                                                                                                                                                                                                                                                                                                                                                                                                                                                                  |                                                                                                                                                                                           |
|---------------------------|--------------------------------------------------------------------------------------------------------------------------------------------------------------------------------------------------------------------------------------------------------------------------------------------------------------------------------------------------------------------------------------------------------------------------------------------------------------------------------------------------------------|-------------------------------------------------------------------------------------------------------------------------------------------------------------------------------------------|
|                           | Chlorophytes                                                                                                                                                                                                                                                                                                                                                                                                                                                                                                 | Non-Green Plants                                                                                                                                                                          |
| <i>cox1.i2</i> (732)*     | <i>Chlorella vulgaris</i> (i1)<br><i>Prototheca wickerhamii</i> (i3)                                                                                                                                                                                                                                                                                                                                                                                                                                         | <i>Dictyostelium discoideum</i> (i2)<br><i>Pichia canadensis</i> (i1)<br><i>Podospora anserina</i> (i9)<br><i>Saccharomyces cerevisiae</i> (i4)<br><i>Schizosaccharomyces pombe</i> (i2a) |
| <i>cox1.i3</i> (743)      |                                                                                                                                                                                                                                                                                                                                                                                                                                                                                                              | <i>Agrocibe aegerita</i> (i2)<br><i>Emericella nidulans</i> (i3)<br><i>Neurospora crassa</i> (i4)<br><i>Schizosaccharomyces pombe</i> (i2)                                                |
| <i>cox1.i4</i> (838)      |                                                                                                                                                                                                                                                                                                                                                                                                                                                                                                              | <i>Pylaiella littoralis</i> (i2)<br><i>Thalassiosira nordenskioldii</i> (i1)                                                                                                              |
| <i>cox1.i5</i> (879)*     | <i>Chlorogonium elongatum</i> (i1)<br><i>Protosiphon botryoides</i> (i1)                                                                                                                                                                                                                                                                                                                                                                                                                                     | <i>Allomyces macrogynus</i> (i8)<br><i>Podospora anserina</i> (i11)                                                                                                                       |
| <i>cox1.i6</i> (912)*     |                                                                                                                                                                                                                                                                                                                                                                                                                                                                                                              | <i>Podospora anserina</i> (i13)                                                                                                                                                           |
| <i>rnl.i1</i> (779)       |                                                                                                                                                                                                                                                                                                                                                                                                                                                                                                              | <i>Agrocibe aegerita</i> (i3)                                                                                                                                                             |
| <i>rnl.i2</i> (1923)      | <i>Ankistrodesmus stipitatus</i> cp (i1)<br><i>Carteria luzenzis</i> cp (i1)<br><i>Chlamydomonas eugametos</i> cp (i5)<br><i>Chlamydomonas monadina</i> cp (i1)<br><i>Chlamydomonas mutabilis</i> cp (i1)<br><i>Chlamydomonas pallidostigmatica</i> cp (i1)<br><i>Chlorococcum echinozigotum</i> cp (i2)<br><i>Chlorogonium elongatum</i> cp (i1)<br><i>Scenedesmus obliquus</i> cp (i1)<br><i>Stigeoclonium helveticum</i> cp (i3)                                                                          |                                                                                                                                                                                           |
| <i>rnl.i3</i> (1931)*     | <i>Chlamydomonas eugametos</i> (i1)<br><i>Chlorella vulgaris</i><br><i>Monomastix</i> sp. M722<br><i>Monomastix</i> sp. OKE-1<br><i>Nephroselmis olivacea</i> (i1)<br><i>Chlamydomonas callosa</i> cp (i3)<br><i>Chlamydomonas frankii</i> cp (i2)<br><i>Chlamydomonas geitleri</i> cp (i1)<br><i>Chlamydomonas komma</i> cp (i2)<br><i>Chlamydomonas mexicana</i> cp (i1)<br><i>Chlamydomonas pallidostigmatica</i> cp (i2)<br><i>Chlorosarcina brevispinosa</i> cp (i2)<br><i>Dunaliella parva</i> cp (i2) | <i>Acanthamoeba castellanii</i> (i1)                                                                                                                                                      |

|               |                                                |                                  |
|---------------|------------------------------------------------|----------------------------------|
|               | <i>Haematococcus lacustris</i> cp (i3)         |                                  |
|               | <i>Monomastix</i> sp. M722 cp (i1)             |                                  |
|               | <i>Monomastix</i> sp. OKE-1 cp (i1)            |                                  |
|               | <i>Neochloris aquatica</i> cp (i2)             |                                  |
|               | <i>Pedinomonas tuberculata</i> cp (i1)         |                                  |
|               | <i>Pterosperma cristatum</i> cp (i1)           |                                  |
| rnl.i5 (2262) | <i>Chlamydomonas callosa</i> cp (i4)           |                                  |
|               | <i>Chlamydomonas frankii</i> cp (i3)           |                                  |
|               | <i>Chlamydomonas monadina</i> cp (i2)          |                                  |
|               | <i>Chlamydomonas pallidostigmatica</i> cp (i3) |                                  |
|               | <i>Chlamydomonas</i> sp. 66.72 cp (i2)         |                                  |
|               | <i>Trebouxia aggregata</i> cp (i1)             |                                  |
| rnl.i6 (2500) | <i>Chlamydomonas eugametos</i> (i3)            | <i>Agrocibe aegerita</i> (i7)    |
|               | <i>Nephroselmis olivacea</i> (i2)              |                                  |
|               | <i>Ankistrodesmus stipitatus</i> cp (i2)       |                                  |
|               | <i>Chara corallina</i> cp (i1)                 |                                  |
|               | <i>Chara vulgaris</i> cp (i1)                  |                                  |
|               | <i>Chlamydomonas frankii</i> cp (i4)           |                                  |
|               | <i>Chlamydomonas humicola</i> cp (i1)          |                                  |
|               | <i>Chlamydomonas monadina</i> cp (i3)          |                                  |
|               | <i>Chlamydomonas starrii</i> cp (i1)           |                                  |
|               | <i>Chlamydomonas zebra</i> cp (i1)             |                                  |
|               | <i>Dunaliella parva</i> cp (i4)                |                                  |
|               | <i>Monomastix</i> sp. OKE-1 cp (i3)            |                                  |
|               | <i>Neochloris aquatica</i> cp (i3)             |                                  |
|               | <i>Nitella</i> sp. cp (i1)                     |                                  |
|               | <i>Pedinomonas tuberculata</i> cp (i3)         |                                  |
|               | <i>Stigeoclonium helveticum</i> cp (i4)        |                                  |
|               | <i>Trebouxia aggregata</i> cp (i2)             |                                  |
|               | <i>Trichosarcina mucosa</i> cp (i1)            |                                  |
| rnl.i8 (2571) |                                                | <i>Allomyces macrogynus</i> (i4) |
| rnl.i9 (2584) |                                                | <i>Agrocybe aegerita</i> (i8)    |
| rns.i1 (793)  | <i>Chlamydomonas pallidostigmatica</i> cp (i2) |                                  |

<sup>a</sup>The insertion site of each intron (see Table S2 and Figure 5) is reported in parentheses. The presence of an asterisk following the parentheses indicates that one or more identically positioned introns exist in *Mesostigma* and/or streptophyte mtDNAs (see Figure 2).

<sup>b</sup>'cp' indicates that the intron originates from the chloroplast genome; introns not labeled with this abbreviation come from the mitochondrial genome. In three cases, the intron number was not indicated in parentheses, because the entire intron content of the interrupted gene remains unknown.
